# Supplementary material for: Vaccination with Irradiated Autologous Tumor Cells Mixed with Irradiated GM-K562 Cells Stimulates Antitumor Immunity and T Lymphocyte Activation in Patients with Recurrent Malignant Glioma
Source: Oxford University Press journal article supplement (doi:10.1158/1078-0432.ccr-15-2163), 2016-02-13
Supplement: 10780432ccr152163-sup-155170_2_supp_0_52c5rj.docx [file 10780432ccr152163-sup-155170_2_supp_0_52c5rj.docx]

**Supplementary Data, Item 1.** Inclusion and Exclusion Criteria.

**Supplementary Data, Item 2.** Extended methods for flow cytometry for lymphocyte phenotyping.

**Supplementary Data, Item 3.** Extended methods for ELISA assay for angiogenic cytokines.

**Supplementary Data, Item 4.** Detailed description of histopathological scoring of vaccination site and delayed-type hypersensitivity biopsies.

**Supplementary Data, Item 5.** Full flow cytometry panel for white blood cell immunophenotyping.

**Supplementary Data, Item 6**.Greatest percent change in expression of selected CD4+ and CD8+ T-lymphocyte markers of activation and regulation. * denotes statistical significance (P< 0.05).
